# Supplementary material for: Latent, early or late HHV-6B expression in adult mesial temporal lobe epilepsy: Association of virus life cycle with inflammatory cytokinesin brain tissue and cerebral spinal fluid
Source: Research Square preprint supplement (doi:10.21203/rs.3.rs-1302425/v1), 2022-02-09
Supplement: Supplementary file 1 [file 70144c2a65ddbb2e246c0924.docx]

**Supplemental Table 1. Primer sequences used for hhv-6B DNA and cytokine mRNA amplification**

|  | **Primer-forward** | **Primer-reverse** |
| --- | --- | --- |
| **HHV-6B (external primer)** | TTTTTCAAAATCGGGCAGAC | AACACATAGTTTGGATCTTCTGCT |
| **HHV-6B(internal primer)** | TCTGATGCCGTTAGACCCA | ATTGCTGCTTCTGTAACCT |
| **HHV-6B for PCR** | GAGACCGGGTCTGGACAACA | GAGTTGCTGAGTTGGTAAAGG |
| **HHV-6B probe** | 6FAM- CTCCAAGTGTACCGAAACGCTTCCTGG- BHQ1 |  |
| **IL-1α** | AGATGCCTGAGATACCCAAAACC | CCAAGCACACCCAGTAGTCT |
| **IL-1β** | ATGATGGCTTATTACAGTGGCAA | GTCGGAGATTCGTAGCTGGA |
| **IL-2** | TCCTGTCTTGCATTGCACTAAG | CATCCTGGTGAGTTTGGGATTC |
| **IL-3** | TCAACAGGGCTGTCAAGAGTT | CAGATAGAACGTCAGTTTCCTCC |
| **IL-4** | CCAACTGCTTCCCCCTCTG | TCTGTTACGGTCAACTCGGTG |
| **IL-5** | TCTACTCATCGAACTCTGCTGA | CCCTTGCACAGTTTGACTCTC |
| **IL-6** | ACTCACCTCTTCAGAACGAATTG | CCATCTTTGGAAGGTTCAGGTTG |
| **IL-7** | TTGGACTTCCTCCCCTGATCC | TCGATGCTGACCATTAGAACAC |
| **IL-8** | ACTGAGAGTGATTGAGAGTGGAC | AACCCTCTGCACCCAGTTTTC |
| **IL-9** | CTCTGTTTGGGCATTCCCTCT | GGGTATCTTGTTTGCATGGTGG |
| **TGF-α** | AGGTCCGAAAACACTGTGAGT | AGCAAGCGGTTCTTCCCTTC |
| **TNF-α** | GAGGCCAAGCCCTGGTATG | CGGGCCGATTGATCTCAGC |
| **TNF-β** | CATCTACTTCGTCTACTCCCAGG | CCCCGTGGTACATCGAGTG |
| **VEGF** | CTACCTCCACCATGCCAAGT | GCAGTAGCTGCGCTGATAGA |
| **β-actin** | TCATGAAGTGTGACGTGGACATC | CAGGAGGAGCAATGATCTTGATCT |
| **GAPDH** | GGAGCGAGATCCCTCCAAAAT | GGCTGTTGTCATACTTCTCATGG |
